# Supplementary figures and images for: The use of response measures in meta-analyses of land-use impacts on ecological communities: a review and the way forward
Source: Springer Nature journal article supplement (doi:10.1007/s10531-018-1583-1), 2018-06-18

Appendix B. The count of studies included in evaluation by publication year.

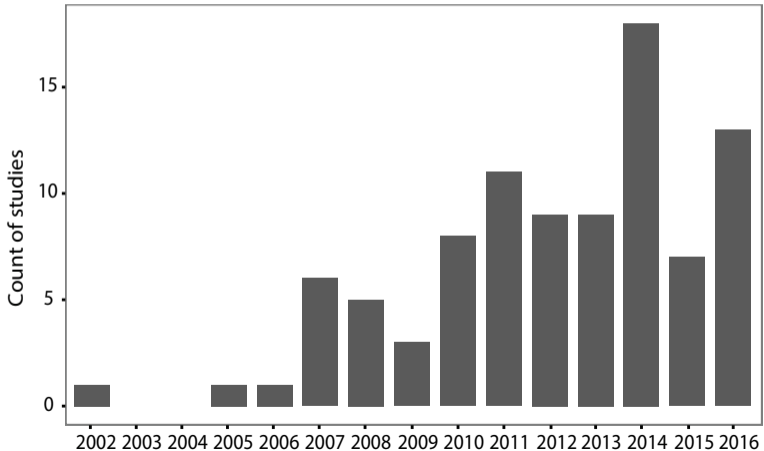

Supplement: MOESM2 [file 15859054]
